# Supplementary material for: The Second-Generation PIM Kinase Inhibitor TP-3654 Resensitizes ABCG2-Overexpressing Multidrug-Resistant Cancer Cells to Cytotoxic Anticancer Drugs
Source: MDPI journal article supplement (doi:10.3390/ijms22179440), 2021-08-30
Supplement: s1 [file s1]

## Supplementary Materials

### The Second-Generation PIM Kinase Inhibitor TP-3654 Resensitizes ABCG2-Overexpressing Multidrug-Resistant Cancer Cells to Cytotoxic Anticancer Drugs

Chung-Pu Wu, Yan-Qing Li, Ya-Chen Chi, Yang-Hui Huang, Tai-Ho Hung, and Yu-Shan Wu

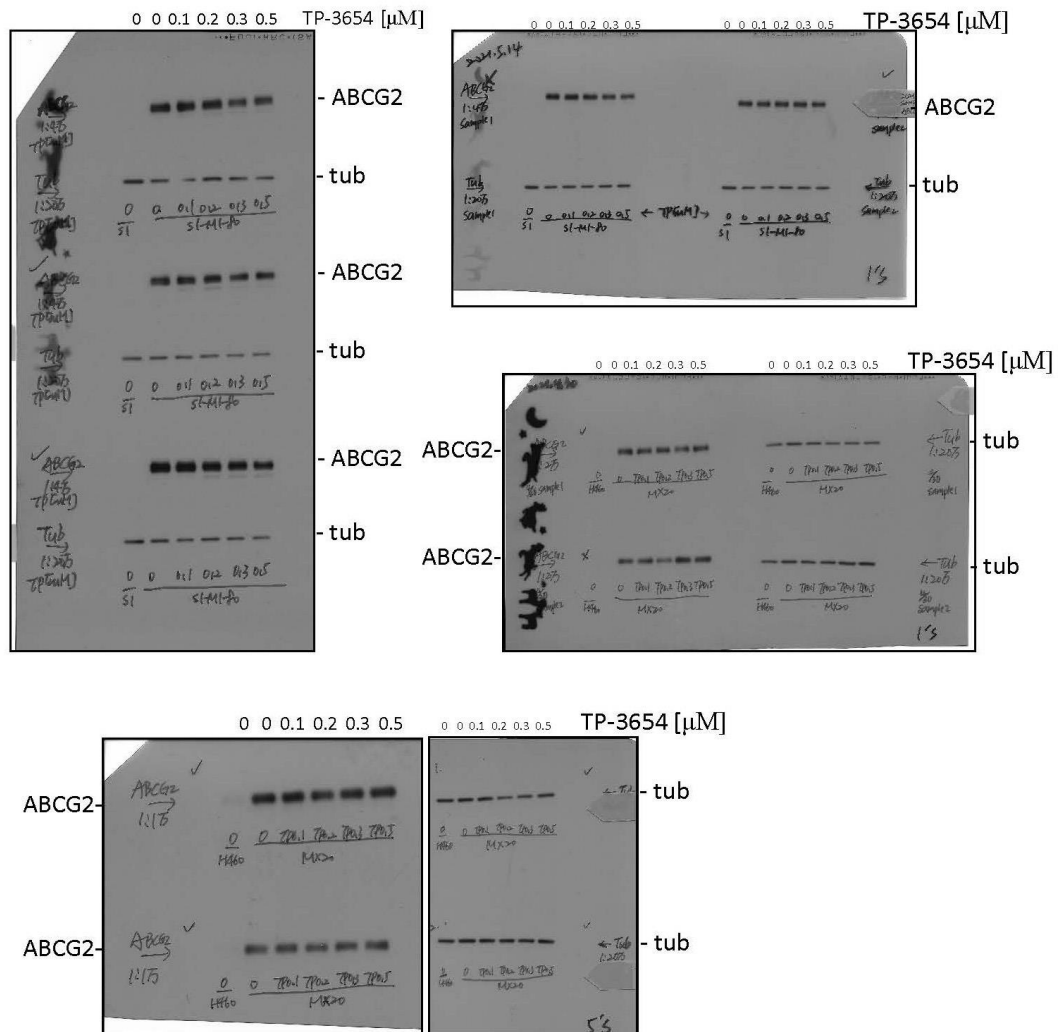

Figure S1: The effect of TP-3654 on the protein expression of ABCG2 in human S1 and S1-M1-80 colon cancer cells, and human H460 and H460-MX20 NSCLC cells.
